# Supplementary material for: Deep Sequencing of H7N9 Influenza A Viruses from 16 Infected Patients from 2013 to 2015 in Shanghai Reveals Genetic Diversity and Antigenic Drift
Source: PubMed Central journal article supplement (PMC6147129; doi:10.1128/mspheredirect.00462-18), 2018-09-19
Supplement: sph005182648sf1.pdf [file sph005182648sf1.pdf]

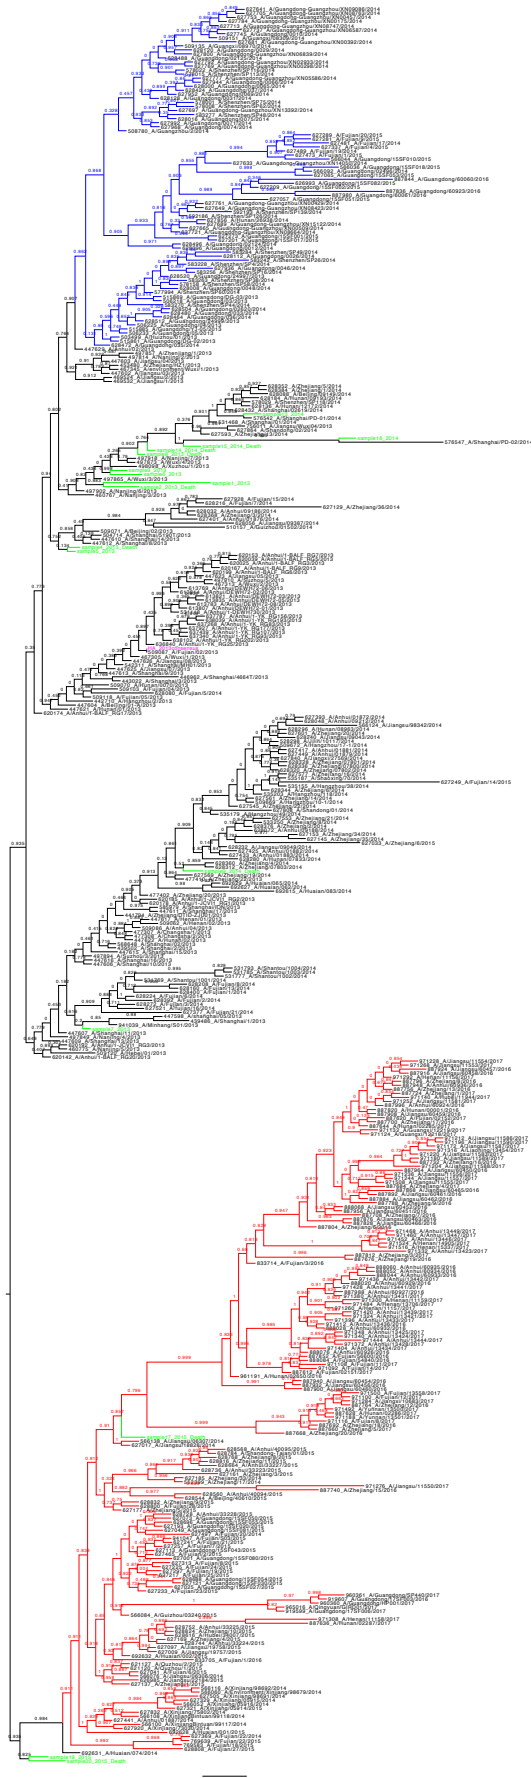

HA

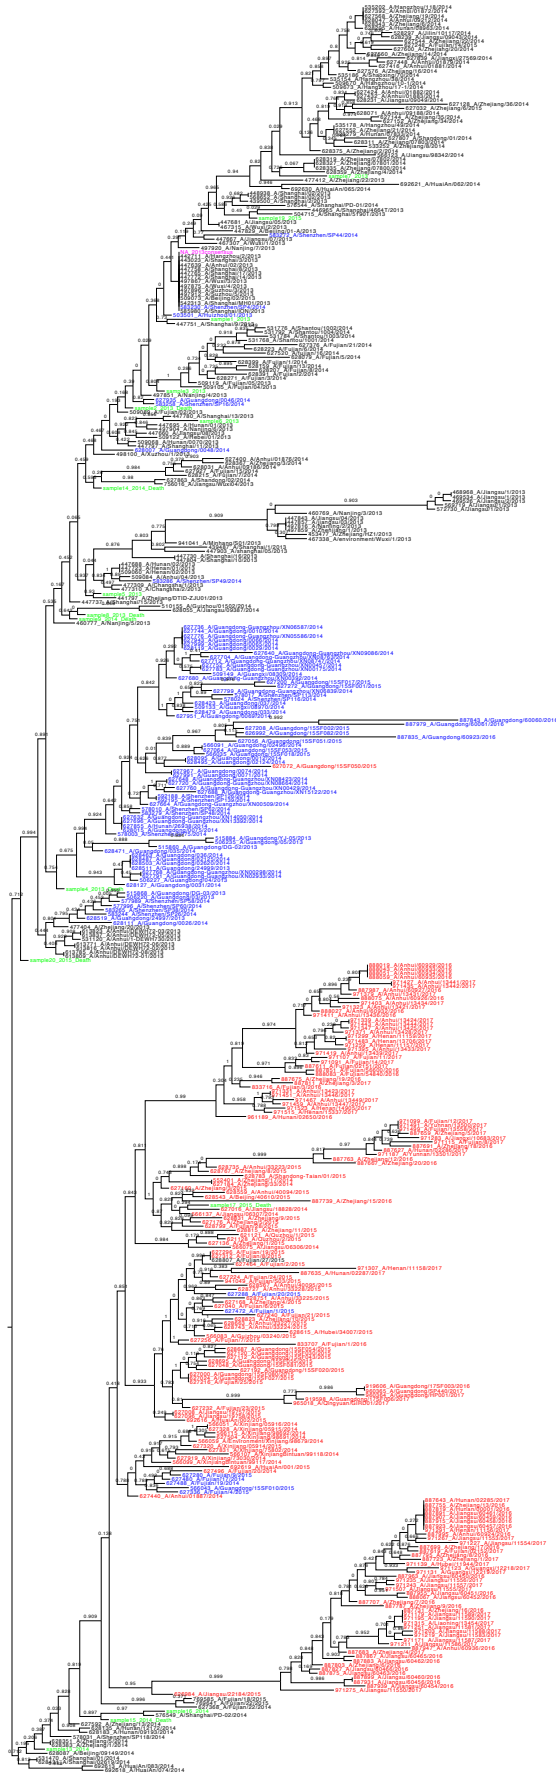

NA





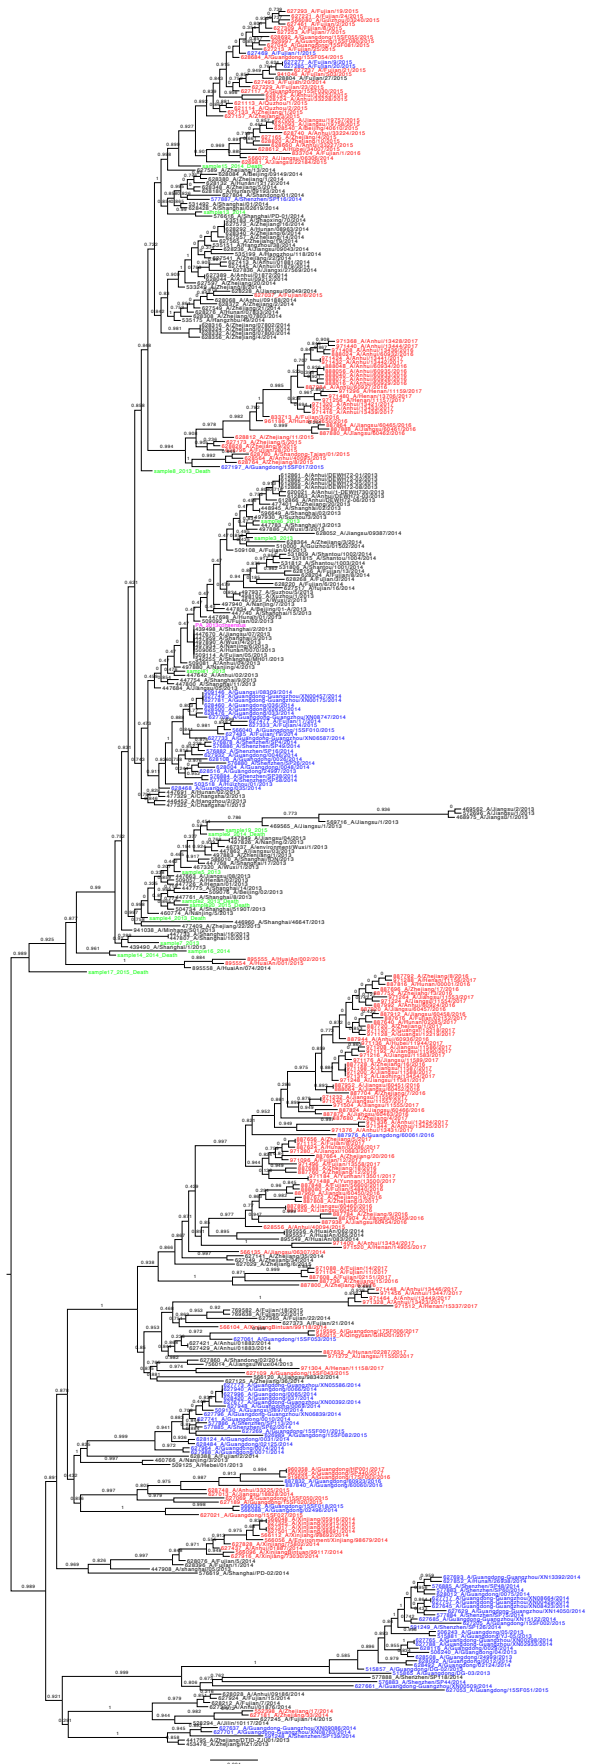

PA



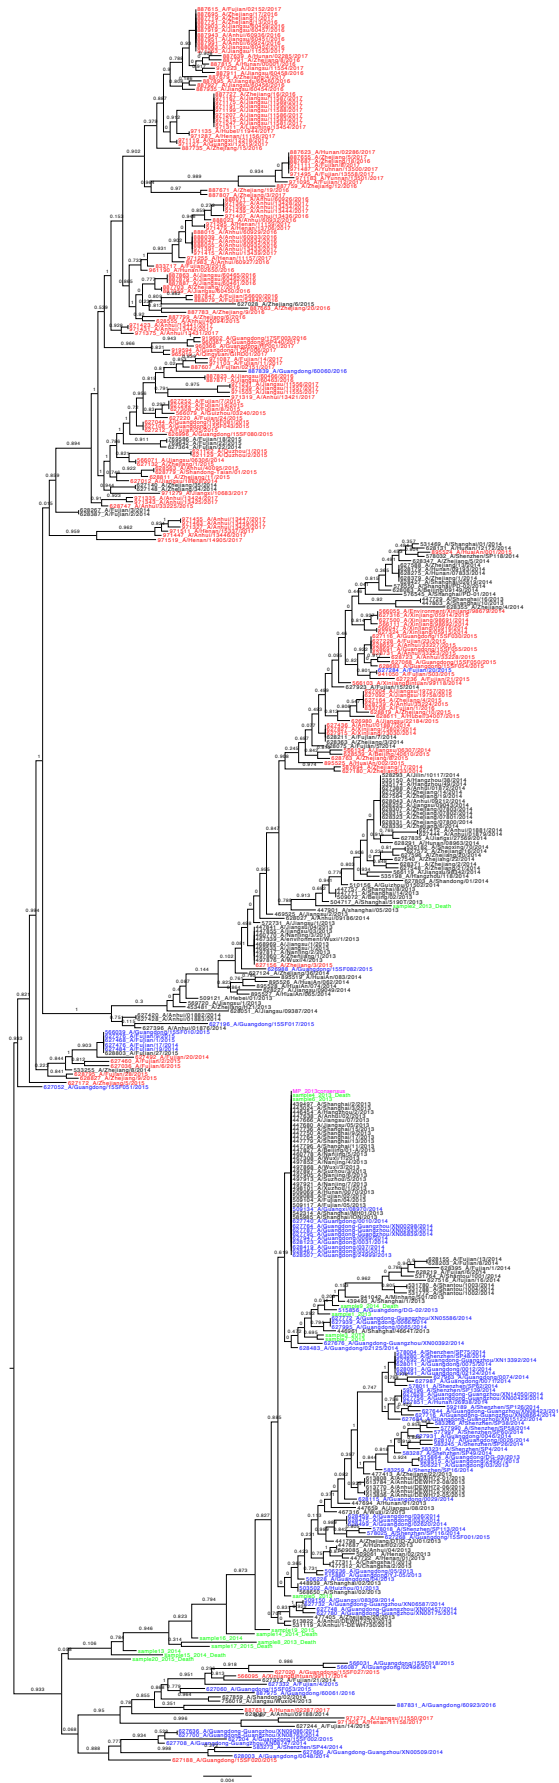

MP

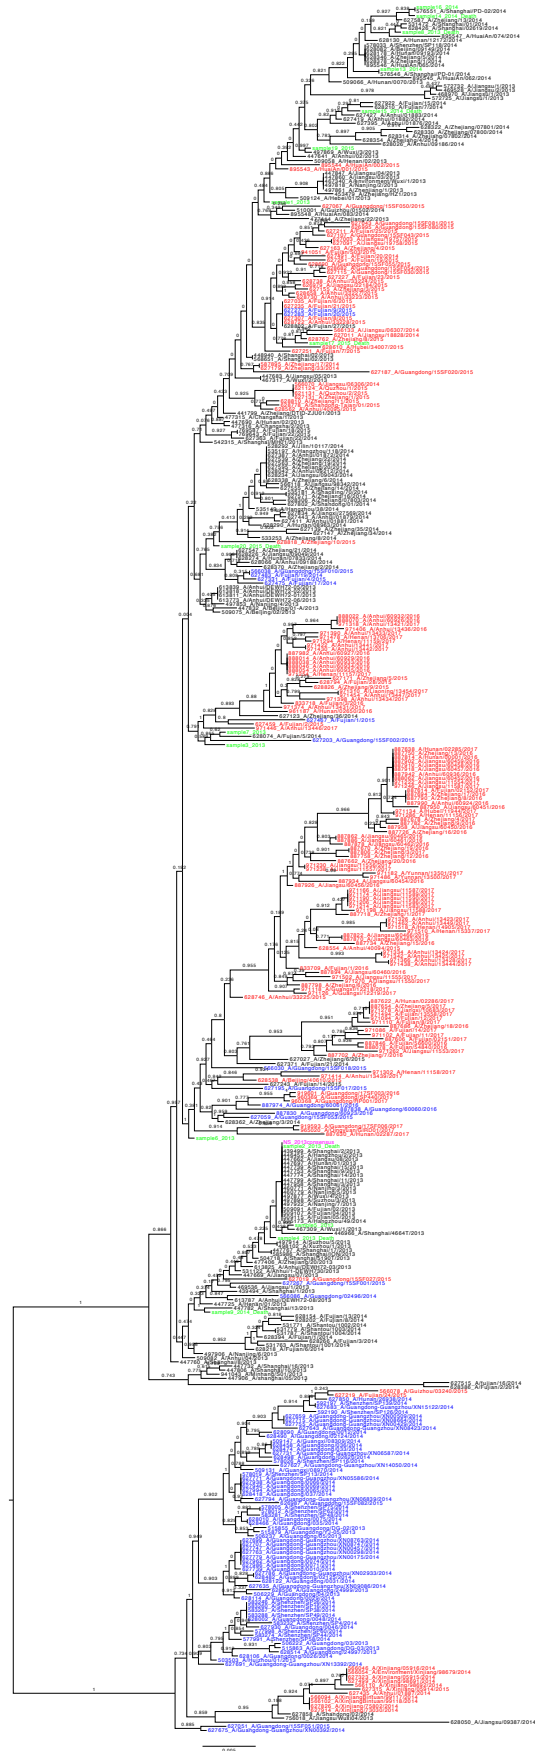

NS
